# Supplementary material
Source: publisher figshare collection journal article supplement (https://acs.figshare.com/ndownloader/files/7840477)
Supplement: Supplementary file 1 [file 7840477]

Supplemental Information for:

Fast MAS  $^1\text{H}$  NMR Study of Water Adsorption and Dissociation on the (100) Surface of Ceria Nanocubes: A Fully Hydroxylated, Hydrophobic Ceria Surface

Lance Gill<sup>a</sup>, Ariana Beste<sup>b</sup>, Banghao Chen<sup>a</sup>, Meijun Li<sup>a</sup>, Amanda K. P. Mann<sup>a</sup>, Steven H. Overbury<sup>a</sup>, and Edward W. Hagaman<sup>a</sup> \*

<sup>a</sup> Chemical Sciences Division, Oak Ridge National Laboratory, Oak Ridge, Tennessee, 37831

<sup>b</sup> Joint Institute for Computational Sciences, The University of Tennessee, Oak Ridge, Tennessee, 37831

[Lance.Gill@bruker.com](mailto:Lance.Gill@bruker.com)

[arianabeste@gmail.com](mailto:arianabeste@gmail.com)

[chen@chem.fsu.edu](mailto:chen@chem.fsu.edu)

[Meijun\\_li@yahoo.com](mailto:Meijun_li@yahoo.com)

[amandpetersak@gmail.com](mailto:amandpetersak@gmail.com)

[overburysh@gmail.com](mailto:overburysh@gmail.com)

[hagamanew@ornl.gov](mailto:hagamanew@ornl.gov)

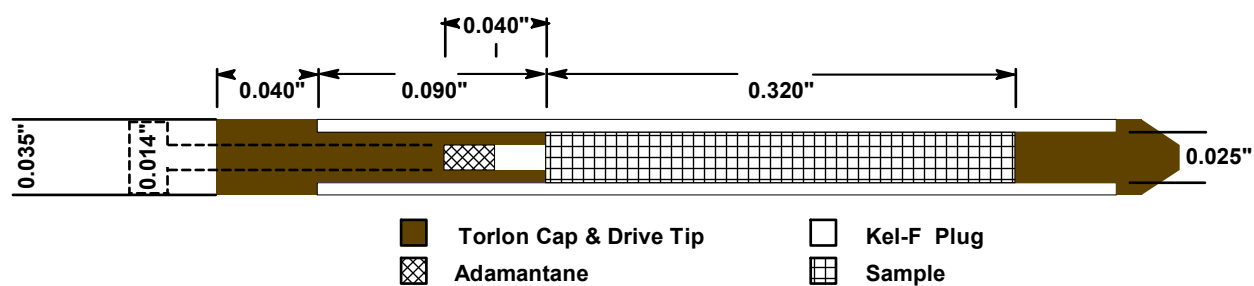

Figure S1. Schematic design of the rotor assembly with the adamantane packed cap used in quantitative experiments using a 1.2mm pencil style rotor.

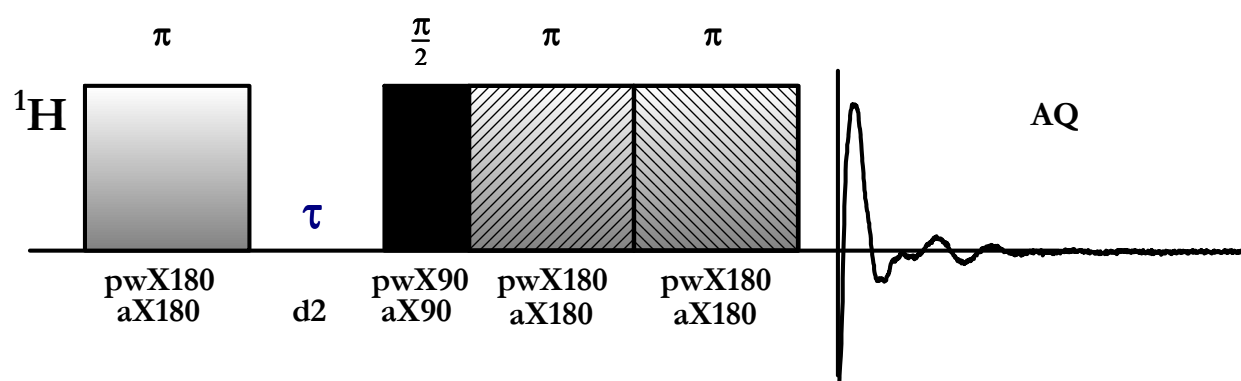

Figure S2a. DEPTH filter adaptation of the standard inversion-recovery pulse sequence for measuring  $T_1$  with background suppression (twopuldpth).

<sup>1</sup>H\_twopuldpth\_CeO2\_cube\_AKPM\_notcalcined\_40kHz\_128scan\_40sd1\_rg20\_vacine70C\_12072014 T1 data summary

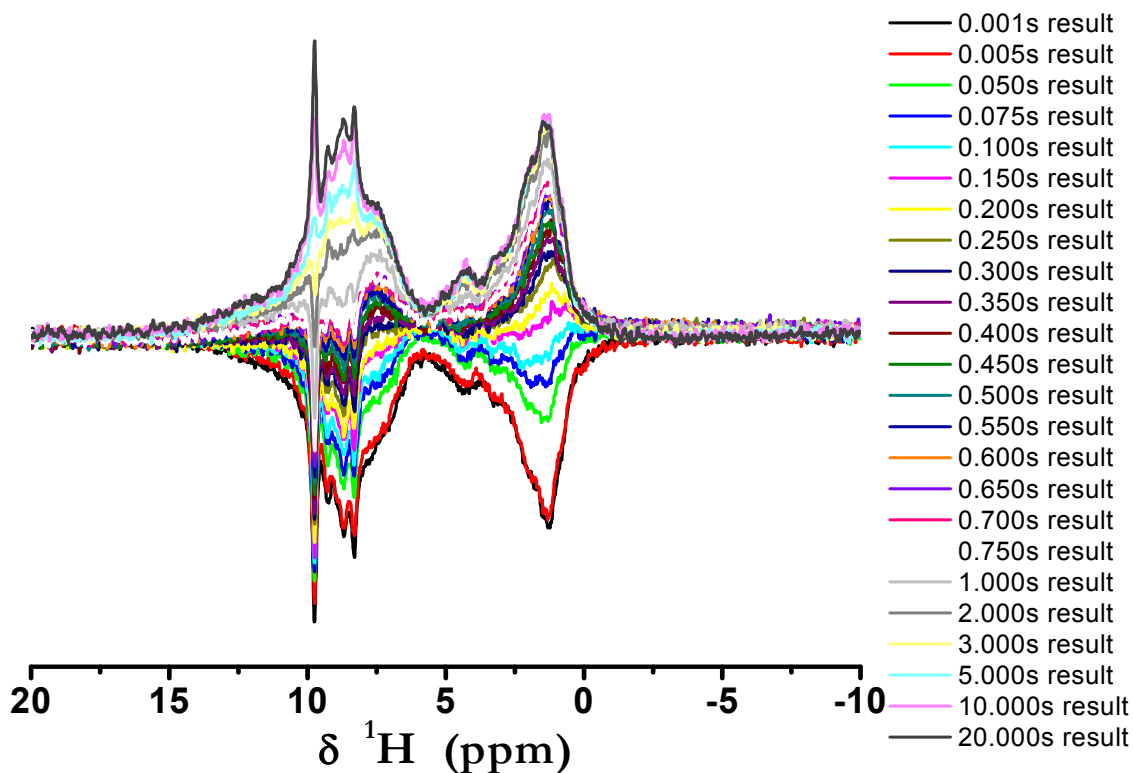

Figure S2b.  $T_1$  inversion-recovery spectra of non-calcined ceria nanocubes using the twopuldpth sequence above. The  $\tau$ -value list is given in the figure. A background  $T_1$  inversion-recovery data set was collected using an empty rotor over the same time scale and each spectrum in the plot above has had the remaining suppressed background removed for more accurate determination of the relaxation rates.

Figures S3-S7, Table S1 and accompanying text: Spin Counting: Surface coverage analysis for evacuated and heated non-calcined ceria nanocubes.

All quantitative spin counting experiments employ one-pulse experiments. The recycle delay was 480 s in benzoic acid calibration experiments to accommodate the 110 s  $T_1$  of the acid proton of benzoic acid- $d_5$ . The ceria samples were acquired using a 40 s recycle delay. The shorter recycle delay does not change the area of the adamantane reference or background signals relative to the calibration runs with the long recycle delay, and is 4 times the longest  $T_1$  of the hydroxylic species measured in the ceria nanocubes.

Figure S3 shows the one pulse benzoic acid- $d_5$ / adamantane spectrum and its deconvolution into its components. Two overlapping lines were used in order to fit accurately the area of the acid proton resonance of benzoic acid. The area sum of these lines (13 ppm) is used in the calculations. The protonated aromatic resonances (8.2, 7.2 and 6.2 ppm) that arise from the ca. 0.5% $H$  in the deuterated ring are also fit, as is the adamantane resonance (1.78 ppm), all with single component lines. The remaining, residual area is identified with six additional lines necessary to result in a flat baseline. These resonances are the background signals, identified here and in empty rotor experiments (not shown). The agreement in position and relative intensity of these lines in these experiments justifies their use in subtraction experiments for ceria samples. The benzoic acid, adamantane and probe background signal data from the deconvolution are tabulated under the spectra in Figure S3. The benzoic acid and adamantane area ratio along with the measured mass of benzoic acid in the rotor (1.7 mg,  $1.337 \times 10^{-5}$  mol) yield the effective adamantane mass of 4.41  $\mu\text{g}$  ( $3.237 \times 10^{-8}$  mol) in the adamcap. The adamcap used in these calibration experiments was used in the subsequent experiments on the ceria nanocubes.

Figures S4-S7 show ceria spectra recorded with the adamcap for the as-received ceria nanocubes, (Figure S4, cube 1 in Table S1), the as-received ceria sample evacuated at room temperature (Figure S5, cube 2 in Table S1), evacuated at 100 °C (Figure S6, cube 3 data in Table S1), and evacuated at 160 °C (Figure S7, cube 4 in Table S1). Data for the sample evacuated at 200 °C is also given (cube 5 in Table S1). The deconvolution analyses are tabulated under the spectra. Derived quantities from the area data are collected in Table S1. The calculations use the following values (see Table S1 footnotes)

Effective adamantane amount in adamcap:  $3.237 \times 10^{-8}$  moles

Surface area of a water molecule:  $11.65 \times 10^{-20} \text{ m}^2/\text{H}_2\text{O}$  (See Table 1 in paper)

Surface area of an –OH function on the ceria (100) surface:  $7.317 \times 10^{-20} \text{ m}^2/\text{–OH}$  (See Table 1 in paper)

The surface area determined on calcined ceria nanocubes in this work is  $17 \text{ m}^2/\text{g}$ . The spin counting experiments used 3.6 mg of as-received, non-calcined ceria nanocubes with an assumed surface area of  $0.0612 \text{ m}^2$ ).

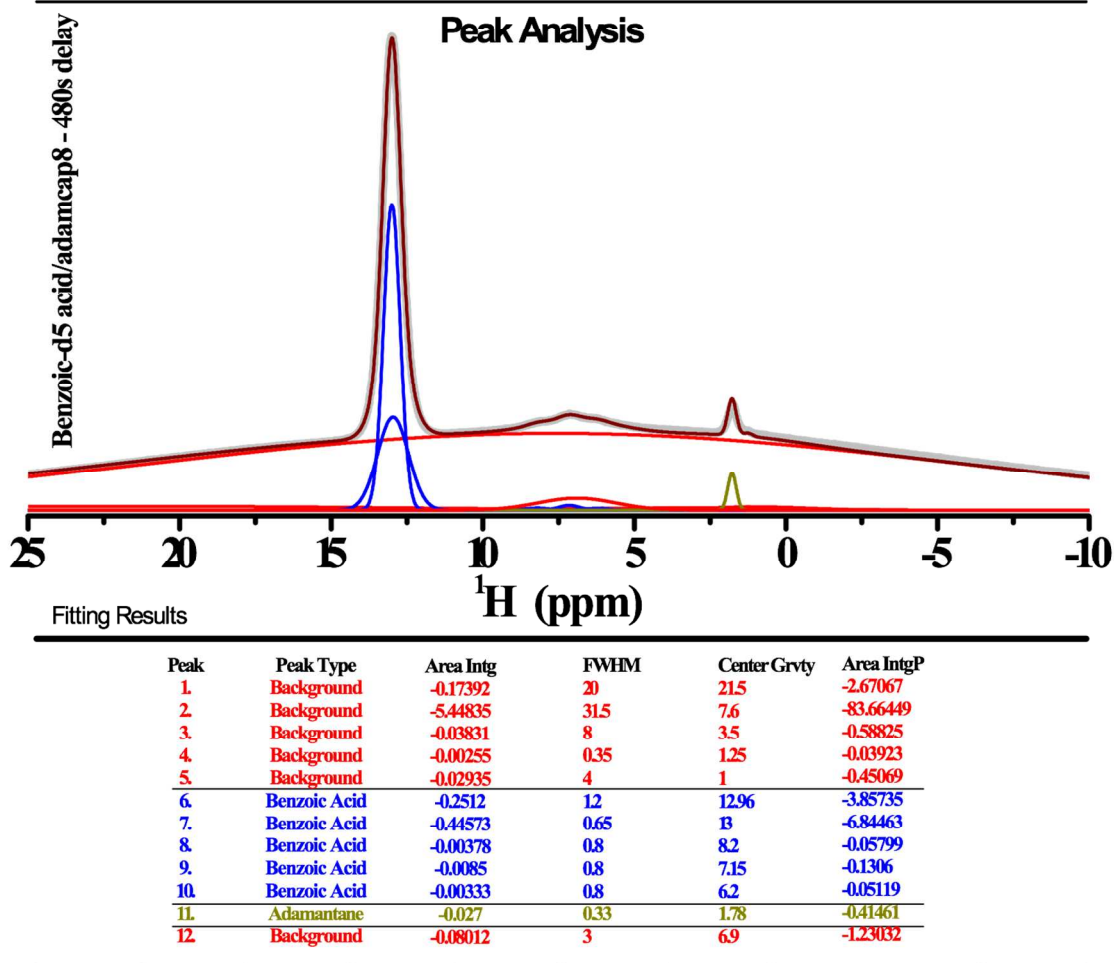

Figure S3. Calibration spectra for adamcap 8. The top spectrum, of benzoic acid-d5 packed in the rotor and adamantane in the adamcap, is the experimental spectrum. Deconvolution spectra and component analysis for these resonances and for background signals from remote probe parts is listed below the spectrum.

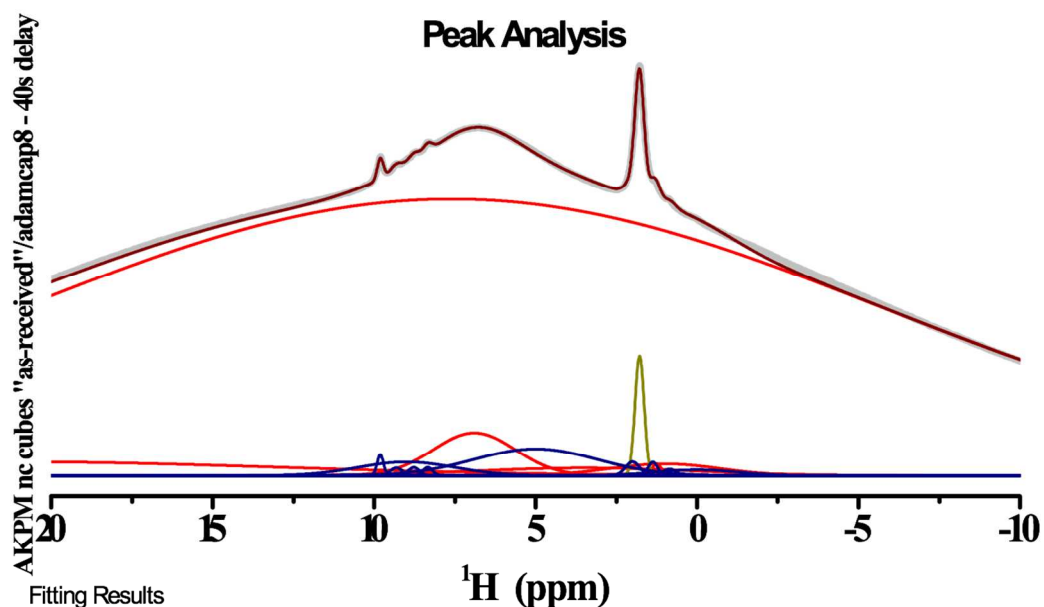

| Peak Type         | Area Intg | FWHM    | Center Grvty | Area IntgP |
|-------------------|-----------|---------|--------------|------------|
| -1 Background     | -0.17392  | 20      | 21.5         | -2.93146   |
| -2 Background     | -5.44835  | 31.5    | 7.6          | -91.83439  |
| -3 Background     | -0.03831  | 8       | 3.5          | -0.64569   |
| -4 Background     | -0.00255  | 0.35    | 1.25         | -0.04306   |
| -5 Background     | -0.02935  | 4       | 1            | -0.4947    |
| -6 Adamantane     | -0.02476  | 0.33    | 1.78         | -0.41732   |
| -7 Background     | -0.08012  | 3       | 6.9          | -1.35046   |
| -8 AKPM nc cubes  | -0.00125  | 3       | 10.2         | -0.02107   |
| -9 AKPM nc cubes  | -0.00296  | 0.22474 | 9.81         | -0.04991   |
| -10 AKPM nc cubes | -0.00217  | 0.44546 | 9.31         | -0.03653   |
| -11 AKPM nc cubes | -0.00206  | 0.40363 | 8.77         | -0.03476   |
| -12 AKPM nc cubes | -0.00176  | 0.33677 | 8.34         | -0.02959   |
| -13 AKPM nc cubes | -0.03     | 3.5     | 9            | -0.50566   |
| -14 AKPM nc cubes | -0.07522  | 4.5     | 5            | -1.26781   |
| -15 AKPM nc cubes | 0         | 0       | 4.7          | 0          |
| -16 AKPM nc cubes | -0.00446  | 0.51431 | 2            | -0.0751    |
| -17 AKPM nc cubes | -0.00288  | 0.34    | 1.37         | -0.0486    |
| -18 AKPM nc cubes | -0.00183  | 0.45    | 0.85         | -0.03086   |
| -19 AKPM nc cubes | -0.01086  | 3       | 0            | -0.18302   |

Figure S4. The spectrum of as-received, non-calcined nanocubes recorded with adamcap8. Deconvolution spectra and component analysis are below. Note the position and intensity of background signals are unchanged from Figure S3.

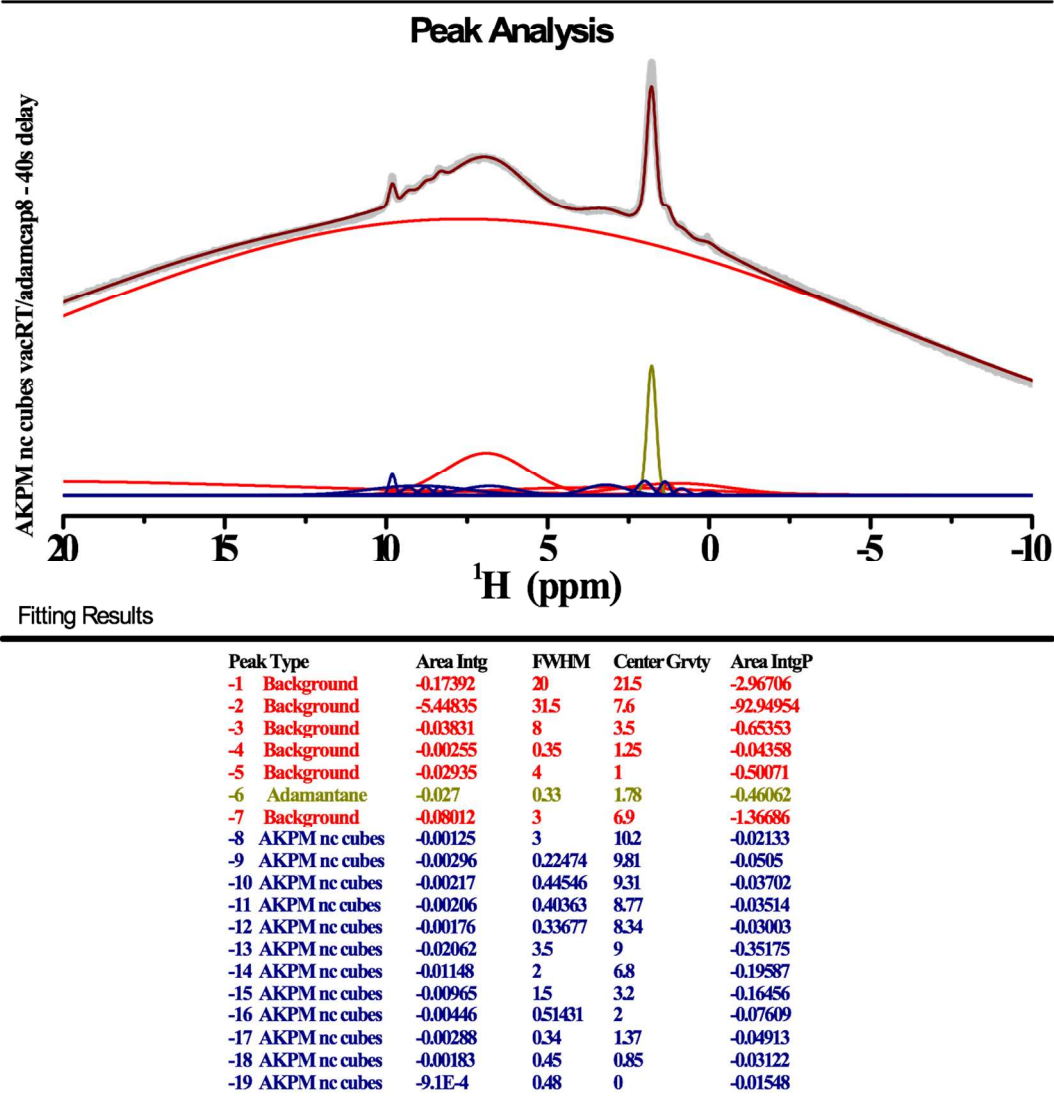

Figure S5. The spectrum of as-received, non-calcined nanocubes evacuated under high vacuum at room temperature (2h) recorded with adamcap8. Deconvolution spectra and component analysis are below.



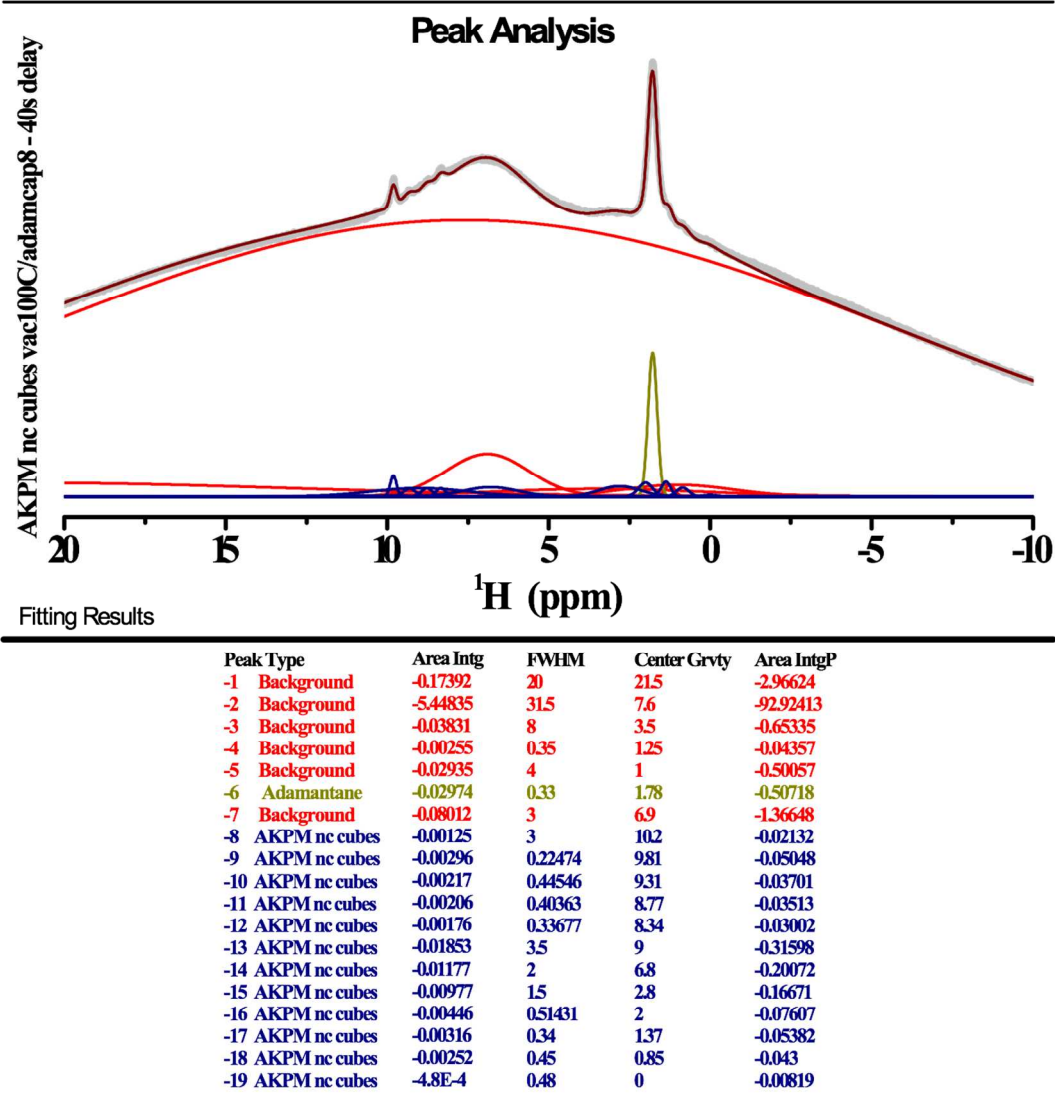

Figure S6. The spectrum of as-received, non-calcined nanocubes evacuated under high vacuum at 100 °C (2h) recorded with adamcap8. Deconvolution spectra and component analysis are below.

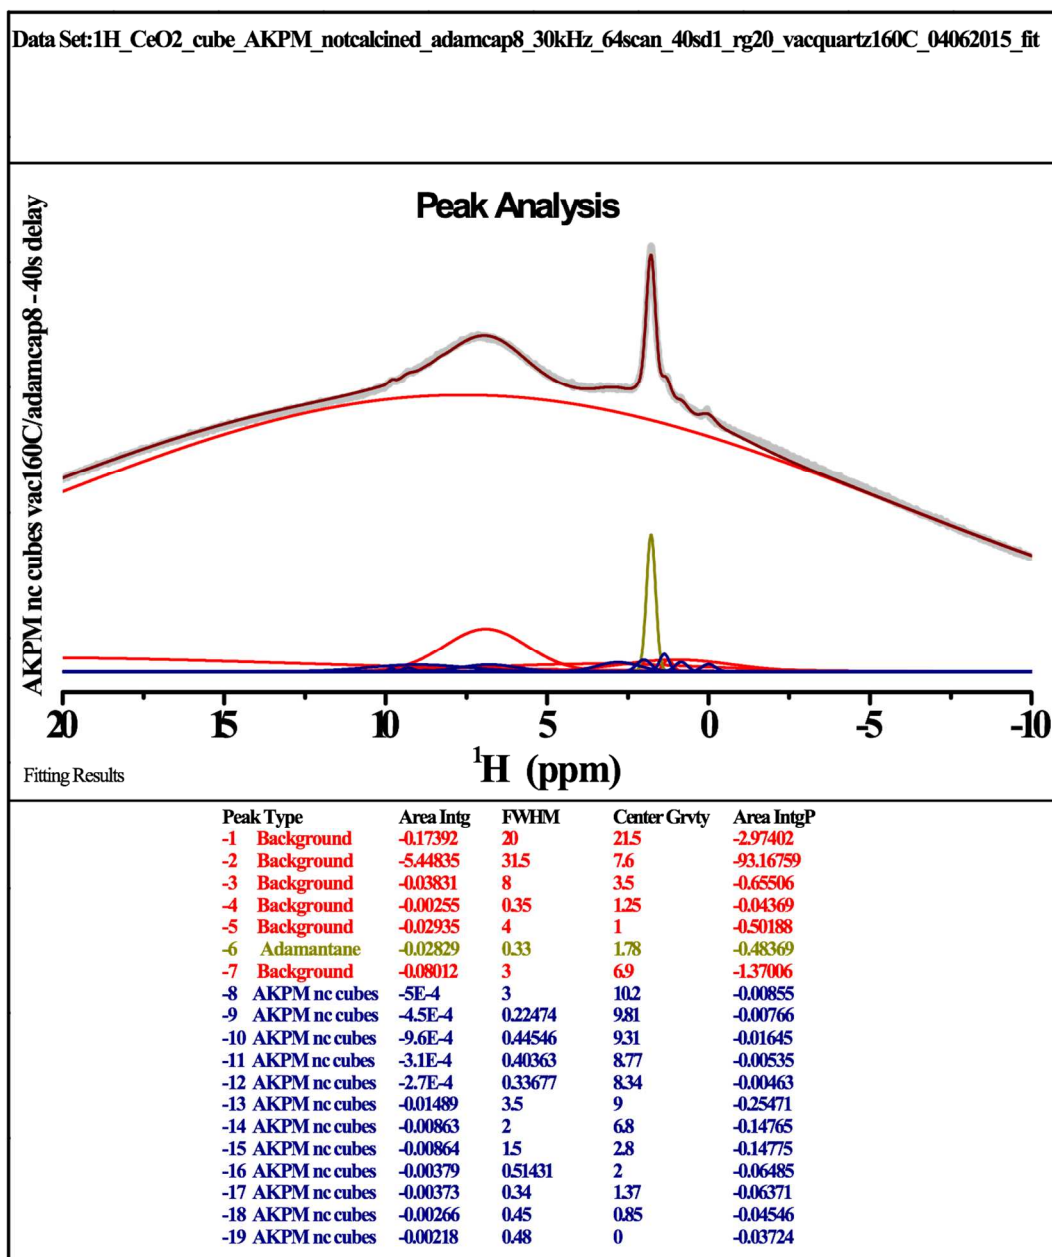

Figure S7. The spectrum of as-received, non-calcined nanocubes evacuated under high vacuum at 160 °C (2h) recorded with adamcap8. Deconvolution spectra and component analysis are below.

Table S1. Water and –OH Surface Area Coverage Calculations for Non-calcined Ceria Nanocubes

| Column | 1 <sup>a</sup>         | 2 <sup>a</sup>           | 3 <sup>a</sup> | 4 <sup>b</sup>                      | 5 <sup>c</sup>         | 6 <sup>d</sup>            | 7 <sup>e</sup> | 8 <sup>f</sup>                     | 9 <sup>g</sup>        | 10 <sup>h</sup>          | 11 <sup>i</sup> |
|--------|------------------------|--------------------------|----------------|-------------------------------------|------------------------|---------------------------|----------------|------------------------------------|-----------------------|--------------------------|-----------------|
| Data   | 1 <sup>j</sup><br>area | H <sub>2</sub> O<br>area | -OH<br>area    | H <sub>2</sub> O/1<br>mole<br>ratio | -OH/1<br>mole<br>ratio | H <sub>2</sub> O<br>moles | -OH<br>moles   | H <sub>2</sub> O<br>m <sup>2</sup> | -OH<br>m <sup>2</sup> | H <sub>2</sub> O<br>% ML | -OH<br>% ML     |
| Cube 1 | 0.0248                 | 0.0752                   | 0.0602         | 24.296                              | 40.259                 | 0.7865                    | 1.3031         | 0.0552                             | 0.057                 | 90                       | 94              |
| Cube 2 | 0.027                  | 0.0115                   | 0.0496         | 3.4015                              | 29.416                 | 0.1101                    | 0.9694         | 0.0077                             | 0.0427                | 13                       | 70              |
| Cube 3 | 0.0297                 | 0.0118                   | 0.0486         | 3.1657                              | 26.168                 | 0.1025                    | 0.8471         | 0.0072                             | 0.0373                | 12                       | 61              |
| Cube 4 | 0.0283                 | 0.0086                   | 0.0362         | 2.4404                              | 20.474                 | 0.0790                    | 0.6627         | 0.0055                             | 0.0293                | 9                        | 48              |
| Cube 5 | 0.027                  |                          | 0.0376         |                                     | 22.252                 |                           | 0.7203         |                                    | 0.0317                | 0                        | 52              |

a. Area sums from spectral deconvolution data.

b. One-half the water area divided by one-sixteenth the adamantane area.

c. –OH area divided by one-sixteenth the adamantane area.

d. Column 4 times the effective moles of adamantane.

e. Column 5 times the effective moles of adamantane.

f. Column 6 times Avogadro's number times the generic water surface area.

g. Column 7 times Avogadro's number times –OH surface area.

h. 100 times Column 8 divided by the ceria nanocube surface area.

i. 100 times Column 9 divided by the ceria nanocube surface area.

j. 1 represents adamantane. The adamantane reference area is reproducible  $\pm 10\%$  and indicates the magnitude of the error from the integration and deconvolution steps. Overall error is considered to be on the order of  $\pm 20\%$ .

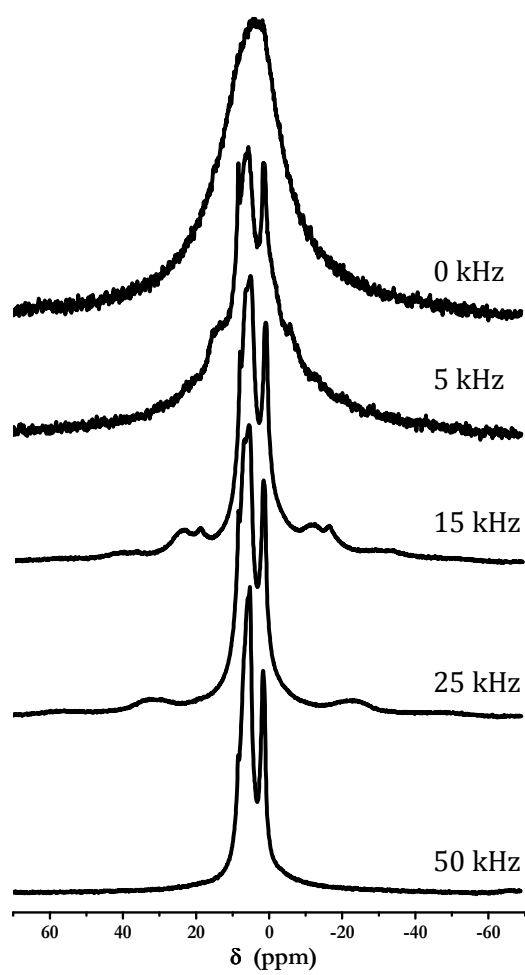

Figure S8. Ceria commercial sample spectra measured at different MAS speeds.

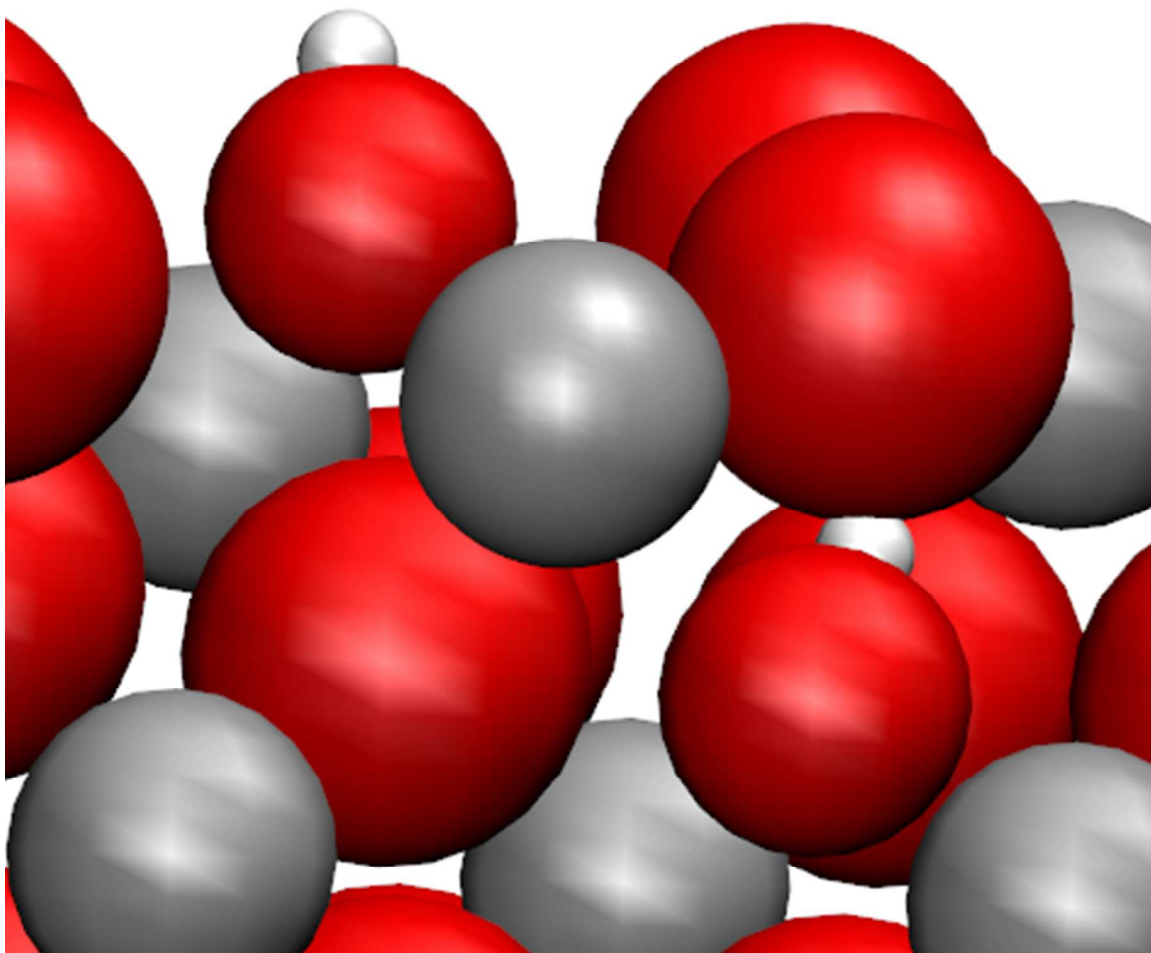

Figure S9. Possible subsurface -OH configuration on ceria, with the -OH bound in the third atomic layer.

The full citation for reference (70) in the paper:

(70) Wang, M.; Wu, X.-P.; Zheng, S.; Zhao, L.; Li, L.; Shen, L.; Gao, Y.; Xue, N.; Guo, X.; Huang, W.; Gan, Z.; Blanc, F.; Yu, Z.; Ke, X.; Ding, W.; Gong, X.-Q.; Grey, C. P.; Peng, L. Identification of Different Oxygen Species in Oxide Nanostructures with  $^{17}\text{O}$  Solid-State NMR Spectroscopy, *Sci. Adv.* **2015**, 1:e1400133.
